# Supplementary material
Source: PubMed Central journal article supplement (PMC1691285)
Supplement: 12769459s01.pdf [file 12769459s01.pdf]

This is an electronic appendix to the paper by Schulte II *et al.* 2003 Molecular phylogenetic evidence for ancient divergence of lizard taxa on either side of Wallace's line. *Proc. R. Soc. Lond. B* **270**, 597—603.

Electronic appendices are refereed with the text. However, no attempt has been made to impose a uniform editorial style on the electronic appendices.

#### ELECTRONIC APPENDIX A

Museum numbers and localities of voucher specimens from which DNA was extracted, and GenBank accession numbers are provided below for newly generated sequences. Acronyms are AF for National Museum of Victoria (NMV), Melbourne, Australia, AM for Australian Museum (AMS), Sydney, Australia, ANWC for the Australian National Wildlife Collection, CSIRO, Canberra, Australia, NTM for Northern Territory Museum of Arts and Sciences, Darwin, Australia, QM for Queensland Museum, Brisbane, Australia, SAMA for the South Australian Museum, Adelaide, Australia, TNHC for Texas Memorial Museum, Austin, Texas, and WAM for Western Australia Museum, Perth, Australia. Institutional abbreviations are as listed in Leviton *et al.* (1985). *Amphibolurus nobbi*, ANWC R5561, AY132999, Shoalwater Bay Army Training Reserve, N Rockhampton, Queensland; *Amphibolurus nobbi coggeri*, SAMA R39293, AY133000, 4.5 km SSE Nobah Bare, South Australia; *Amphibolurus norrisi*, SAMA R39591, AY133001, 5 km N Balargarang, South Australia; *Amphibolurus temporalis*, NTM R21675, AY133002, Shoal Bay Military Reserve, Northern Territory; *Diporiphora albilabris*, NTM R20941, AY133003, Mary River, Northern Territory; *Diporiphora arhemenica*, NTM R13836, AY133004, Pine Creek, Mt. Todd, Northern Territory; *Diporiphora australis*, ANWC R5480, AY133005, Shoalwater Bay Army Training Reserve, N Rockhampton, Queensland; *Diporiphora bennettii*, NTM R23780, AY133006, Wickham River, Gregorory NP, (16°50'S-130°10'E) Northern Territory; *Diporiphora lalliae*, NTM R23779, AY133007, Wickham River, Gregorory NP, (16°47.30'S-130°09.09'E)

Northern Territory; *Diporiphora linga*, SAMA R32072, AY133008, 5.5 km S Immarna Siding, South Australia; *Diporiphora magna*, NTM R18657, AY133009, Mosquito Flat, Bradshaw Station, (15°23.19'S-130°07.42'E) Northern Territory; *Diporiphora pindan*, NTM R17952, AY133010, Discovery Well, Western Australia; *Diporiphora reginae*, AFD 65854, AY133011, 20.1 km NE Buningonia Springs, Western Australia; *Diporiphora winneckeii*, SAMA R51465, AY133012, 19 km WNW Atna Hill, Simpson Desert, (26°19.31S-137°21.20E) South Australia; *Hypsilurus boydii*, QM J60630, AY133013, Mt. Boolbun South, Queensland; *Hypsilurus bruijnii*, AM SR122474, AY133014, Fogamaiyu, Southern Highlands Province, Papua-New Guinea; *Hypsilurus modestus*, AM SR115478, AY133015, Yuro, Chimbu Province, Papua-New Guinea; *Hypsilurus nigrigularis*, TNHC 52009, AY133016, BQ 207 205.; c. 2000m., c. 10 km NW Simbai, Kaironk Village, Madang Province, Papua-New Guinea; *Hypsilurus papuensis*, SAMA tissue specimen 12965, AY133017, Wau, Morobe Province, Papua-New Guinea; *Hypsilurus spinipes*, ANWC R5324, AY133018, Nana Creek Area, N Coffs Harbour, New South Wales; *Lophognathus gilberti*, ANWC R5117, AY133019, 69 Km W of turn off to Normanton, on Rd. to Burketown, Queensland; *Pogona brevis*, AE1703, AY133020, Muttaburra, Queensland; *Pogona henrylawsoni*, SAMA R42745, AY133021, N of Muttaburra, Queensland; *Pogona minimus*, SAMA R22813, AY133022, Lort River, Coomalbidgup, Western Australia; *Pogona minor*, SAMA R25678, AY133023, near Yalata Roadhouse, South Australia; *Pogona mitchelli*, ANWC R6149, AY133024, ~22 km W Glen Helen Homestead on Namatjira Dr., Northern Territory; *Pogona nullarbor*, SAMA R26393, AY133025, 12 km NW Hughes, South Australia; *Pogona vitticeps*, SAMA R42415, AY133026, Mabel Creek Station, South Australia; *Tympanocryptis centralis*, SAMA R31761, AY133030 208 km E Pipilyatjarra, South

Australia; *Tympanocryptis cephalus*, SAMA R22854, AY133027, 21 km N Roebourne, Western Australia; *Tympanocryptis houstoni*, WAM R119738, AY133028, 40 km W Mundrabilla Roadhouse, Western Australia; *Tympanocryptis intima*, SAMA R40665, AY133029, Moolawatana Homestead, (29°51'S-139°40'E) South Australia; *Tympanocryptis pinguicolla*, ANWC R5786, AY133031, Majura Firing Range, N Canberra Airport, Australian Capital Territory; *Tympanocryptis tetraporophora*, ANWC R5612, AY133032, Morella Station, 65 km NNW of Walgett, New South Wales.

Previously reported sequences from Melville *et al.* (2001) and their GenBank accession numbers are provided below. *Ctenophorus caudicinctus*, AF375623; *Ctenophorus clayi*, AF375620; *Ctenophorus cristatus*, AF375622; *Ctenophorus femoralis*, AF375627; *Ctenophorus fionni*, AF375638; *Ctenophorus fordii*, AF375626; *Ctenophorus gibba*, AF375625; *Ctenophorus isolepis*, AF375629; *Ctenophorus maculatus*, AF375628; *Ctenophorus maculosus*, AF375621; *Ctenophorus mckenziei*, AF375631; *Ctenophorus nuchalis*, AF375633; *Ctenophorus ornatus*, AF375624; *Ctenophorus pictus*, AF375635; *Ctenophorus reticulatus*, AF375634; *Ctenophorus rubens*, AF375630; *Ctenophorus rufescens*, AF375636; *Ctenophorus salinarum*, AF375640; *Ctenophorus scutulatus*, AF375632; *Ctenophorus tjantjalka*, AF375637; *Ctenophorus vadrappa*, AF375639; *Rankinia diemensis*, AF375619. Previously reported sequences from Macey *et al.*, (1997b, 2000) and their GenBank accession numbers are provided below. *Leiolepis belliana*, U82689 [Macey *et al.*, (1997b)]; *Physignathus cocincinus*, U82690 [Macey *et al.*, (1997b)]; *Hypsilurus dilophus*, AF128466; *Moloch horridus*, AF128467; *Hypsilurus (Arua) modestus*, AF128464; *Chelosania brunnea*, AF128465; *Physignathus lesueurii*, AF128463; *Lophognathus longirostris*, AF128462; *Amphibolurus muricatus*, AF128468; *Chlamydosaurus*

*kingii*, AF128469; *Caimanops amphiboluroides*, AF128472; *Diporiphora bilineata*, AF128473; *Pogona barbata*, AF128474; *Tympanocryptis lineata*, AF128475; *Ctenophorus adelaidensis*, AF128471; and *Ctenophorus decresii*, AF128470.
